# Supplementary material for: Influence of Ionizing Radiation on Spontaneously Formed Aggregates in Proteins or Enzymes Solutions
Source: MDPI journal article supplement (doi:10.3390/pharmaceutics15051367), 2023-04-29
Supplement: s1 [file s1]

## Supplementary Materials

Karolina Radomska, Marian Wolszczak \*

\* Correspondence: marian.wolszczak@p.lodz.pl

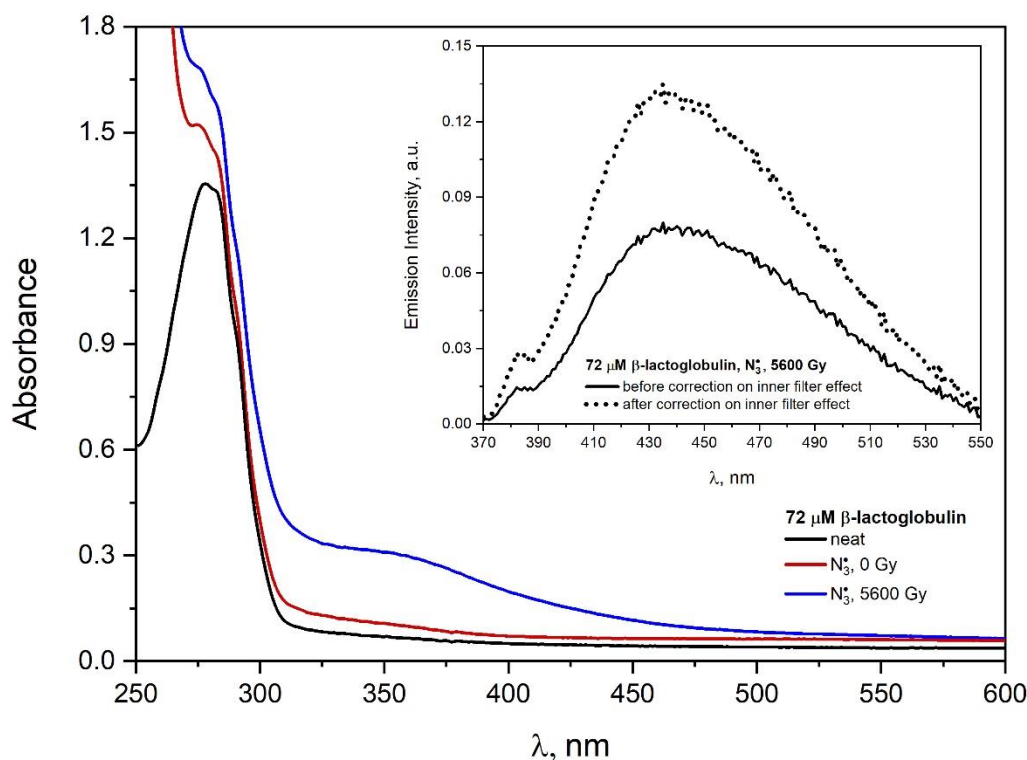

**Figure S1.** Absorption spectra of  $\text{N}_2\text{O}$ -saturated  $\beta$ -lactoglobulin solution (72  $\mu\text{M}$ ) containing  $\text{NaN}_3$  (0.1 M) before and after irradiation with dose 5600 Gy. **Insert.** Emission spectrum of  $\text{N}_2\text{O}$ -saturated buffer  $\beta$ -lactoglobulin solution (72  $\mu\text{M}$ ) containing  $\text{NaN}_3$  (0.1 M), obtained for irradiation dose 5600 Gy, before and after correction on inner filter effect.

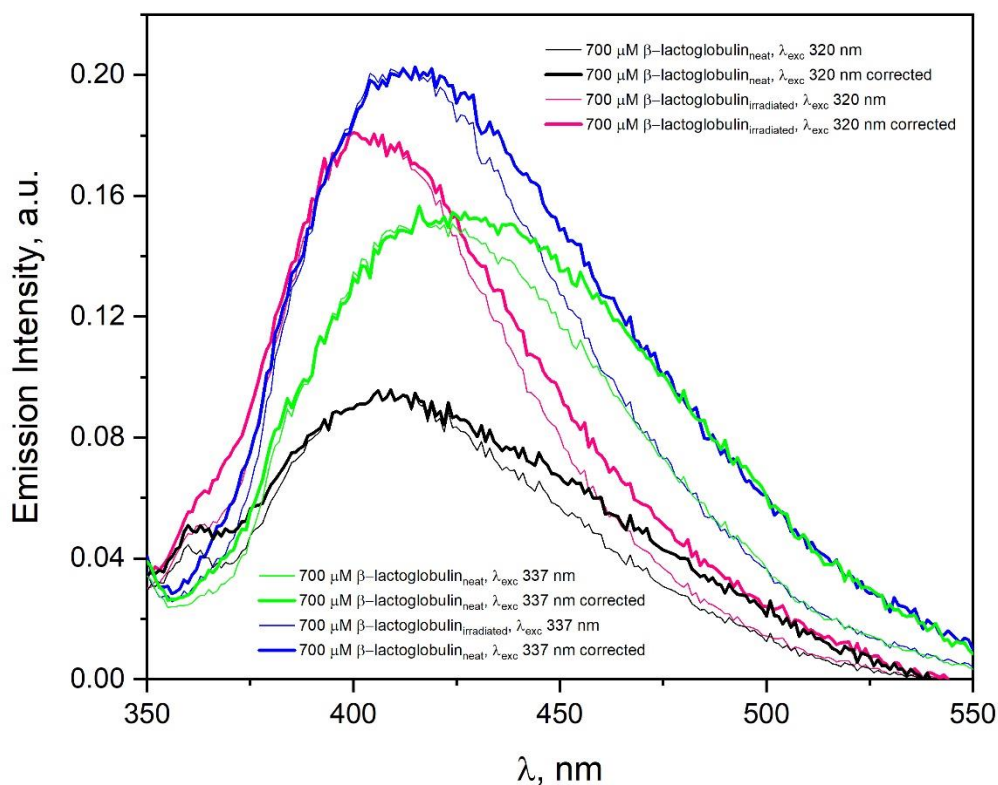

**Figure S2.** Emission spectra of neat  $\beta$ -lactoglobulin (700  $\mu$ M) solution and  $\text{N}_2\text{O}$ -saturated buffer  $\beta$ -lactoglobulin solution (700  $\mu$ M) containing  $\text{NaN}_3$  (0.1 M), obtained for irradiation dose 1000 Gy (thin curves). The excitation wavelength was 320 or 337 nm. The thick curves represent the  $\beta$ -lactoglobulin emission spectra after correction for instrument response (mainly photomultiplier spectral response).

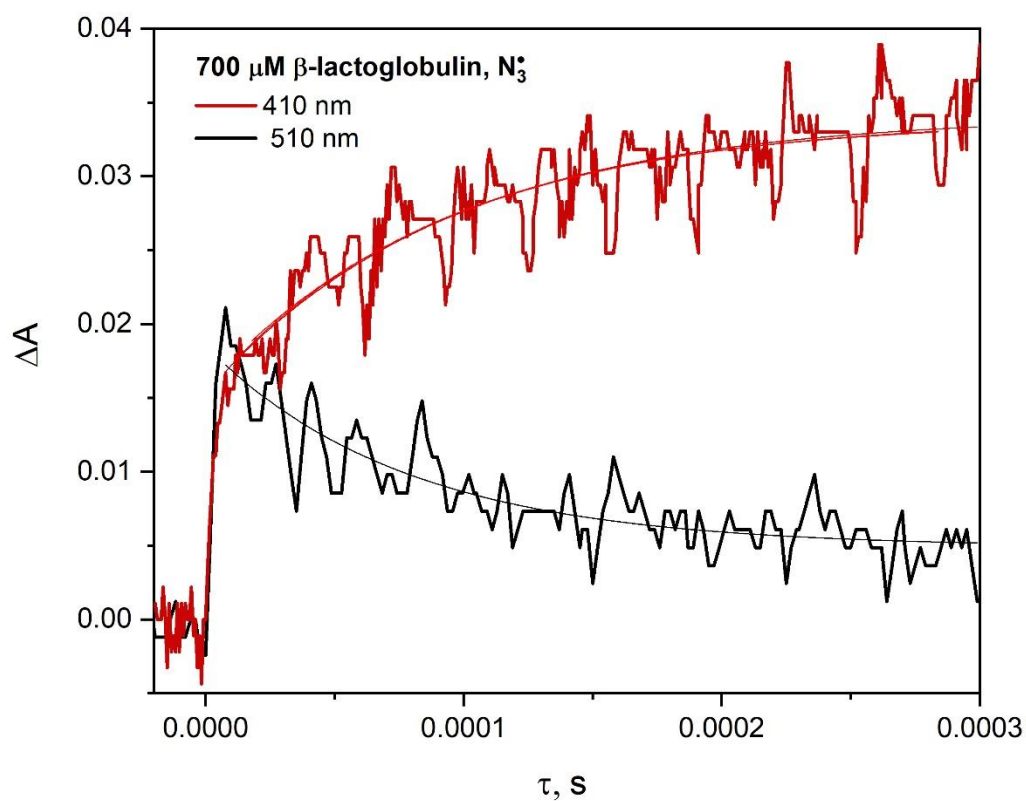

**Figure S3.** Time profiles of the absorbance recorded at 410 or 510 nm after irradiation with a dose of 200 Gy of the  $\text{N}_2\text{O}$ -saturated aqueous solution containing  $\beta$ -lactoglobulin (700  $\mu\text{M}$ ) and  $\text{NaN}_3$  (0.1 M).

**Table S1.** The amount of Tyr and Trp residue in the structure of proteins and enzymes.

|                                         | M        | Trp | Tyr |
|-----------------------------------------|----------|-----|-----|
| <b>HSA</b>                              | 66.3 kDa | 1   | 17  |
| <b>BSA</b>                              | 66.4 kDa | 2   | 21  |
| <b>OVA</b>                              | 45.0 kDa | 3   | 10  |
| <b>papain</b>                           | 23.4 kDa | 5   | 19  |
| <b>histone</b>                          | 21.0 kDa | 0   | 14  |
| <b><math>\beta</math>-lactoglobulin</b> | 18.4 kDa | 2   | 4   |
| <b>lysozyme</b>                         | 14.4 kDa | 6   | 3   |
| <b>insulin</b>                          | 6.0 kDa  | 0   | 4   |
| <b>VEALYL</b>                           | 660 Da   | 0   | 1   |

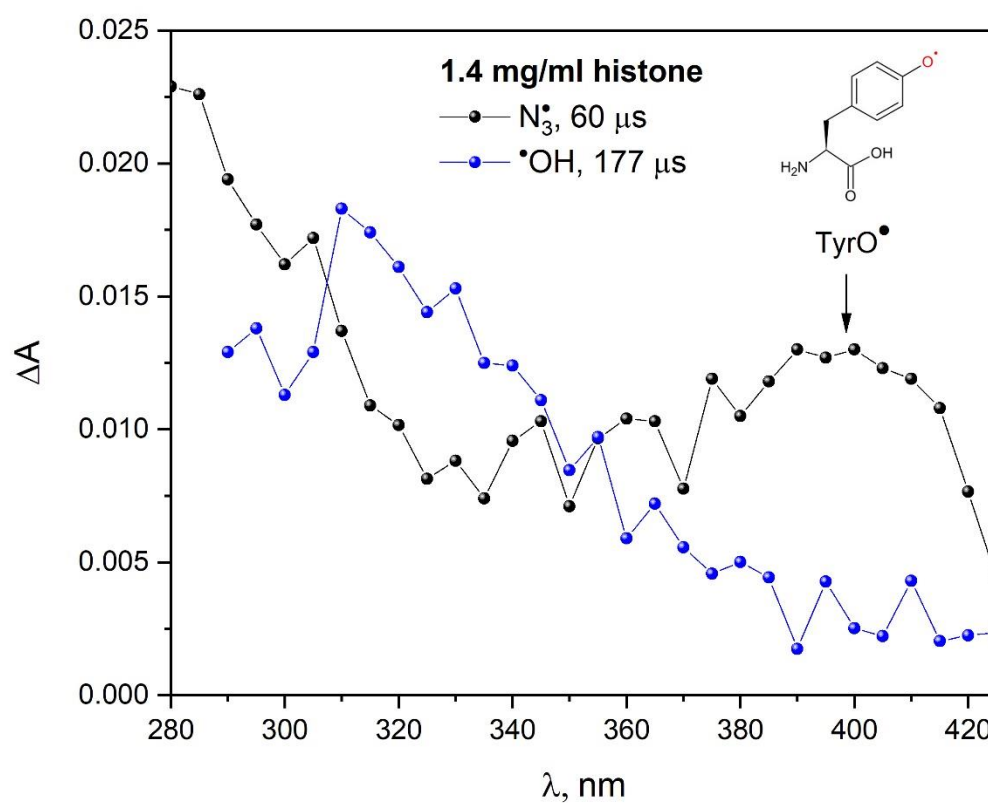

**Figure S4.** Transient absorption spectra of  $\text{N}_2\text{O}$ -saturated buffer solutions containing 1.4 mg/ml histone and 0.1 M  $\text{NaN}_3$ , obtained for an irradiation dose of 55 Gy.

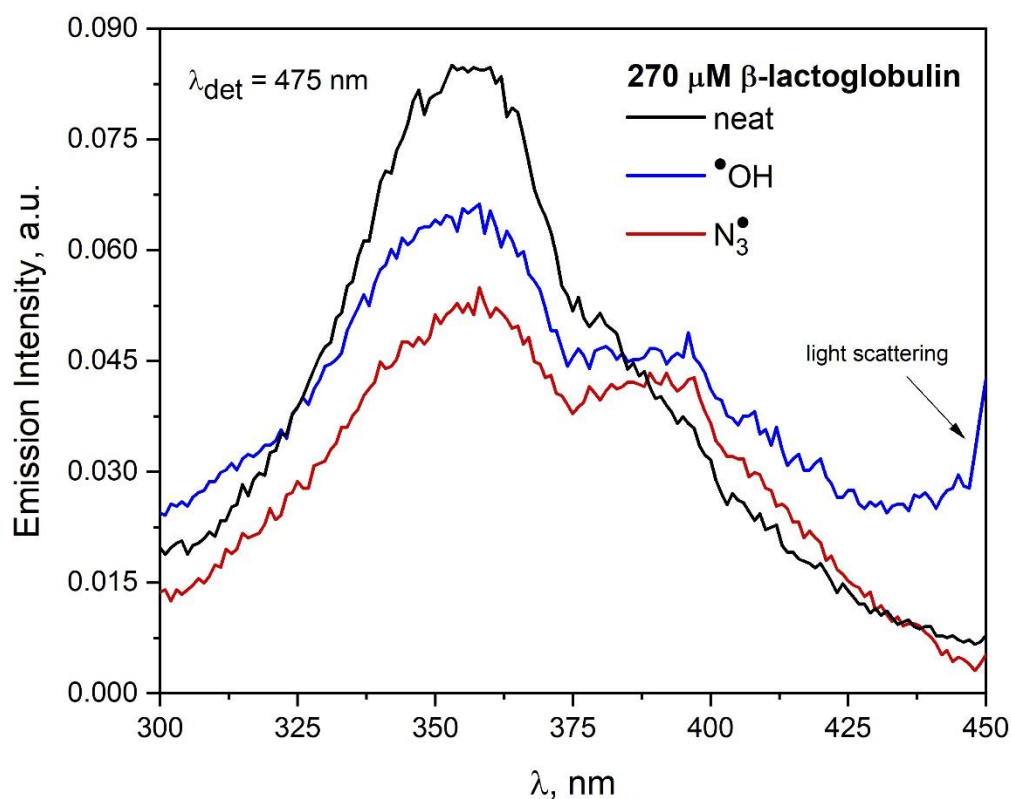

**Figure S5.** Emission excitation spectra of the  $\text{N}_2\text{O}$ -saturated  $\beta$ -lactoglobulin solution ( $270\ \mu\text{M}$ ), recorded before irradiation (black line). Emission excitation spectra of the  $\text{N}_2\text{O}$ -saturated  $\beta$ -lactoglobulin solution ( $270\ \mu\text{M}$ ), recorded after irradiation with a dose  $24\ \text{kGy}$  (blue line). Emission excitation spectra of the  $\text{N}_2\text{O}$ -saturated  $\beta$ -lactoglobulin solution ( $270\ \mu\text{M}$ ) containing  $\text{NaN}_3$  ( $0.1\ \text{M}$ ), recorded after irradiation with a dose  $24\ \text{kGy}$  (red line).

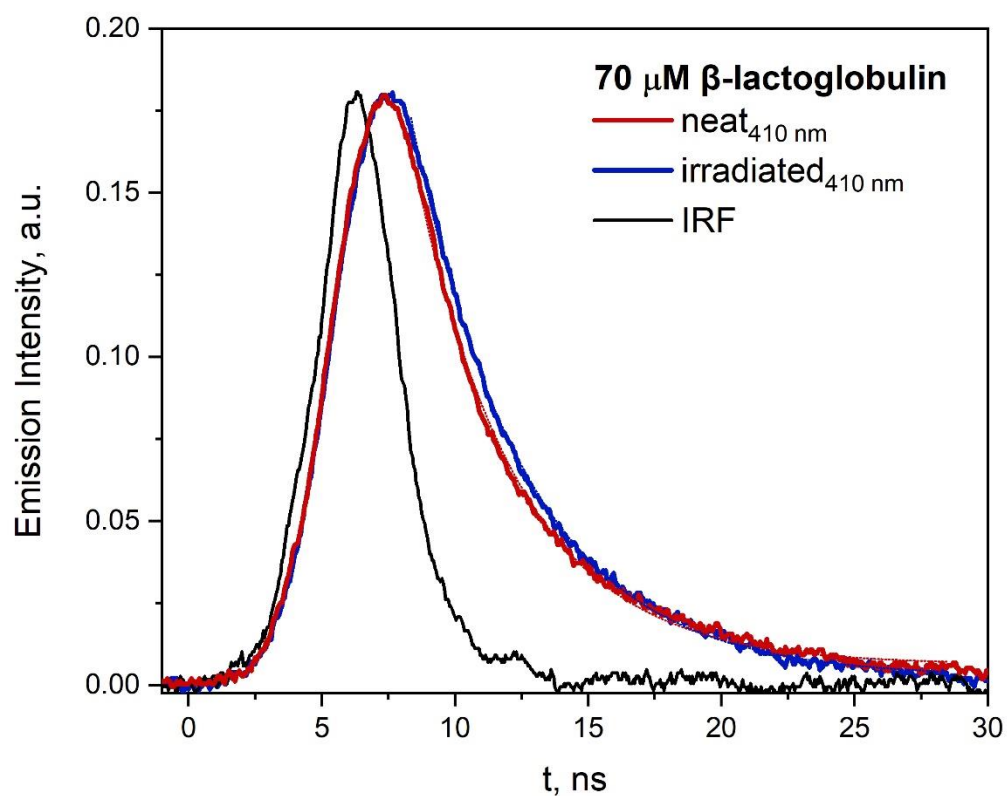

**Figure S6.** Decays of fluorescence of the neat  $\beta$ -lactoglobulin (70  $\mu$ M) solution and solution of  $\beta$ -lactoglobulin (70  $\mu$ M) containing  $\text{NaN}_3$  (0.1 M) obtained for irradiation dose 200 Gy (red and blue lines, respectively). Fitting curves (dotted lines, 3.55 ns and 3.76 ns) superimposed on the experimental runs (noisy lines).

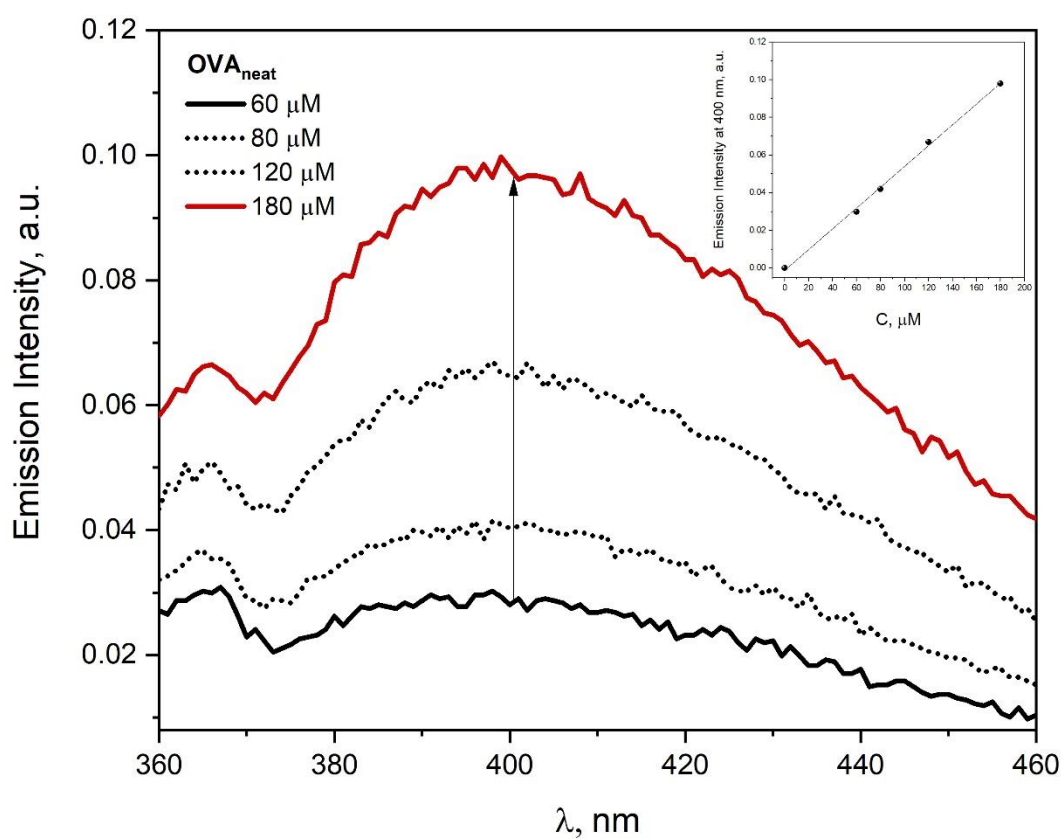

**Figure S7.** Emission spectra of a neat OVA solutions (60–180  $\mu\text{M}$ ). The excitation wavelength was 320 nm. **Insert:** Dependence of  $I_{\text{max}}$  as a function of OVA concentration.  $I_{\text{max}}$ —intensity of OVA emission in buffer solution at maximum of emission band,  $\lambda_{\text{exc}} = 320$  nm.

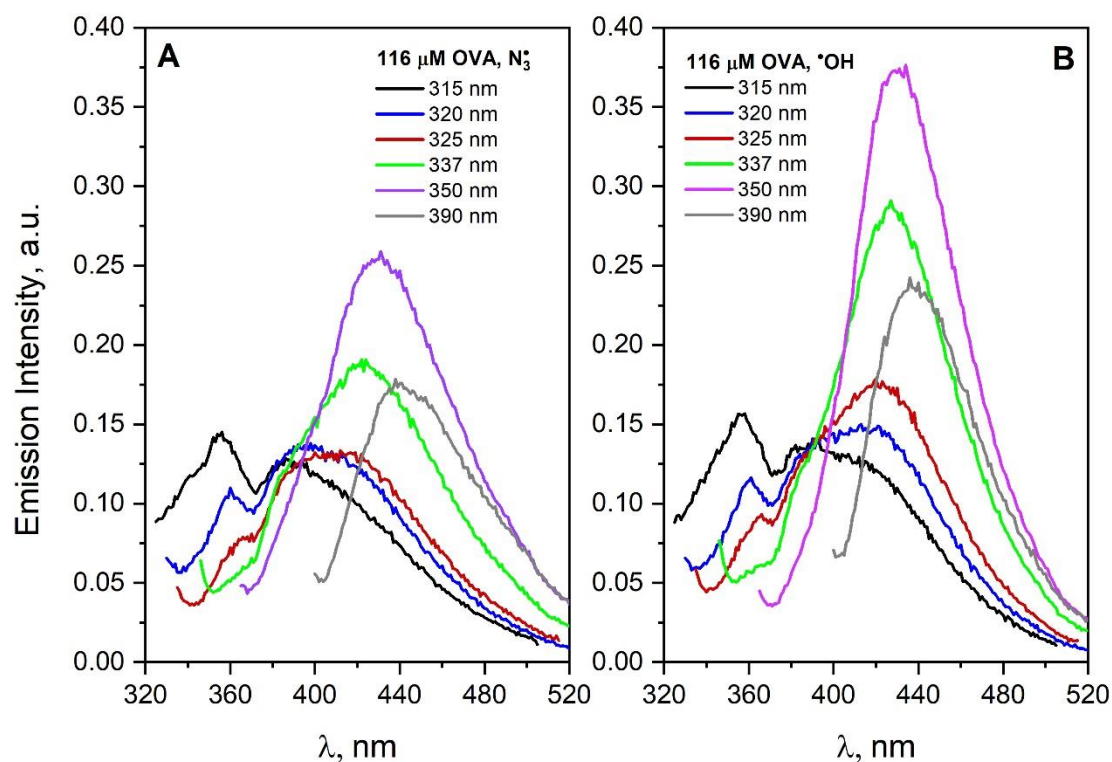

**Figure S8 (A).** Emission spectra of the  $\text{N}_2\text{O}$ -saturated OVA solution ( $116\ \mu\text{M}$ ) containing  $\text{NaN}_3$  ( $0.1\ \text{M}$ ), recorded after irradiation with a dose  $2200\ \text{Gy}$ . The excitation wavelengths are given in the figure. **(B).** Emission spectra of the  $\text{N}_2\text{O}$ -saturated OVA solution ( $116\ \mu\text{M}$ ), recorded after irradiation with a dose  $2200\ \text{Gy}$ . The excitation wavelengths are given in the figure.



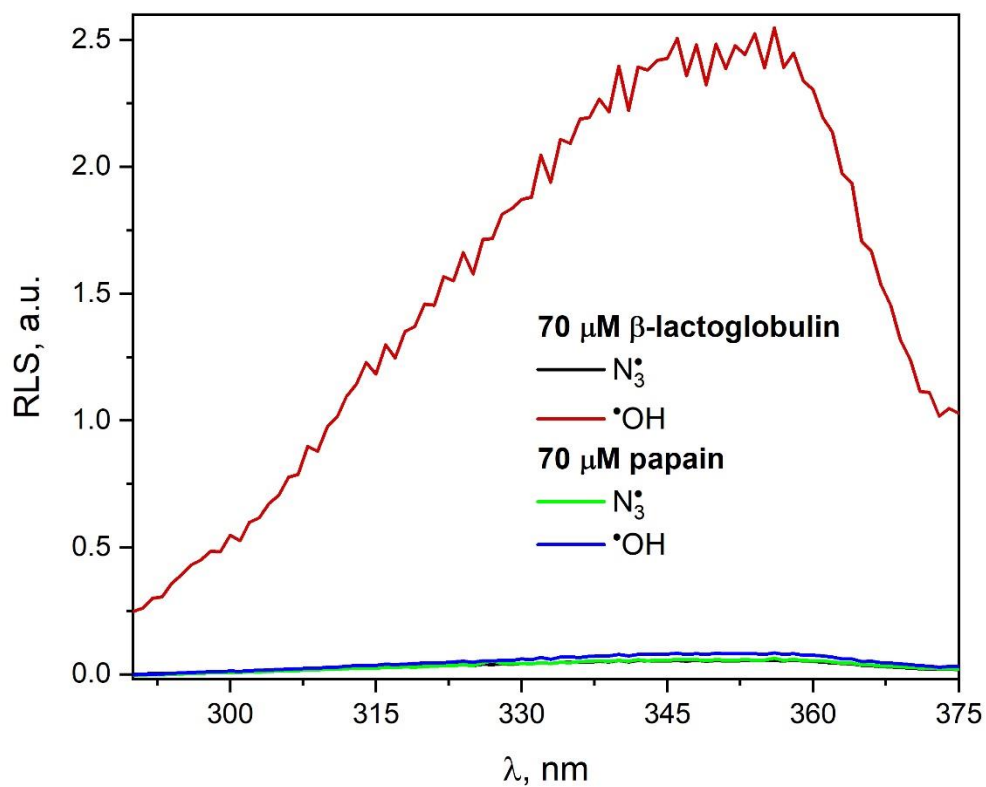

**Figure S9.** The RLS spectra of  $\text{N}_2\text{O}$ -saturated buffer solution containing  $70\ \mu\text{M}$   $\beta$ -lactoglobulin or  $70\ \mu\text{M}$  papain, obtained for an irradiation dose of  $5600\ \text{Gy}$ . The RLS spectra of  $\text{N}_2\text{O}$ -saturated buffer solution containing  $0.1\ \text{M}$   $\text{NaN}_3$  and  $70\ \mu\text{M}$   $\beta$ -lactoglobulin or  $70\ \mu\text{M}$  papain, obtained for an irradiation dose of  $5600\ \text{Gy}$ .

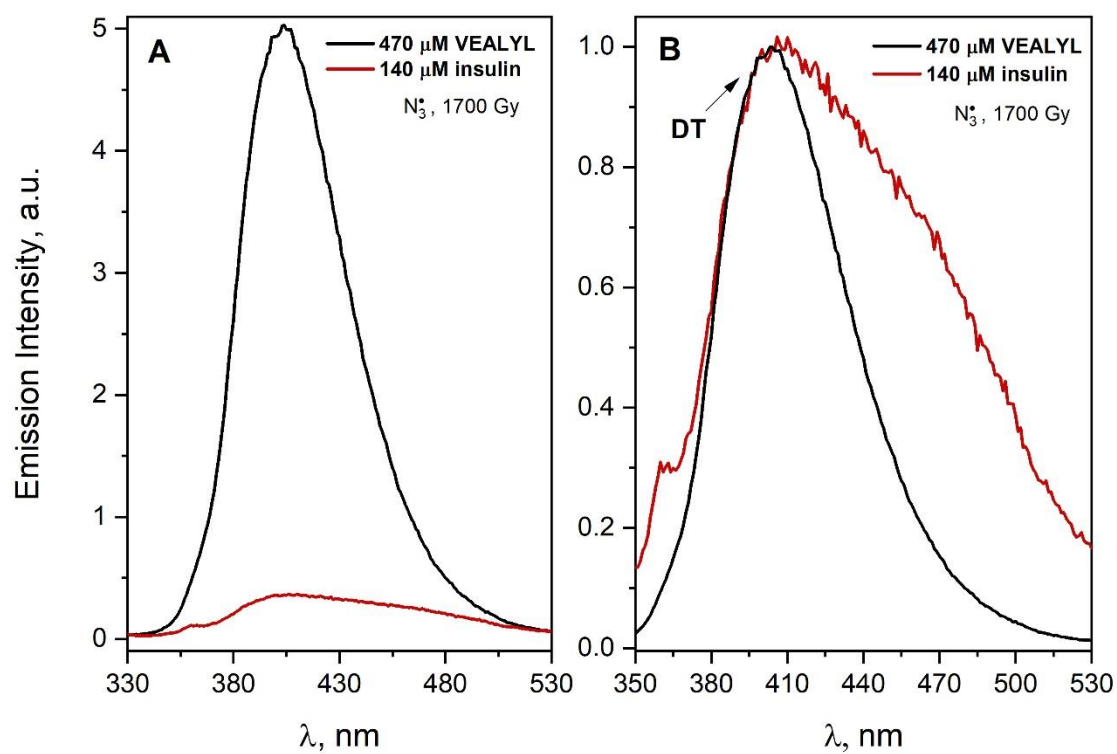

**Figure S10 (A).** Emission spectra of  $\text{N}_2\text{O}$ -saturated buffer solution of VEALYL (470  $\mu\text{M}$ ) or insulin solution (140  $\mu\text{M}$ ) containing  $\text{NaN}_3$  (0.1 M), recorded after irradiation with dose 1700 Gy. The excitation wavelength was 320 nm. **(B).** Normalized emission spectra of  $\text{N}_2\text{O}$ -saturated buffer solution of VEALYL (470  $\mu\text{M}$ ) or insulin solution (140  $\mu\text{M}$ ) containing  $\text{NaN}_3$  (0.1 M), recorded after irradiation with dose 1700 Gy. The excitation wavelength was 320 nm.

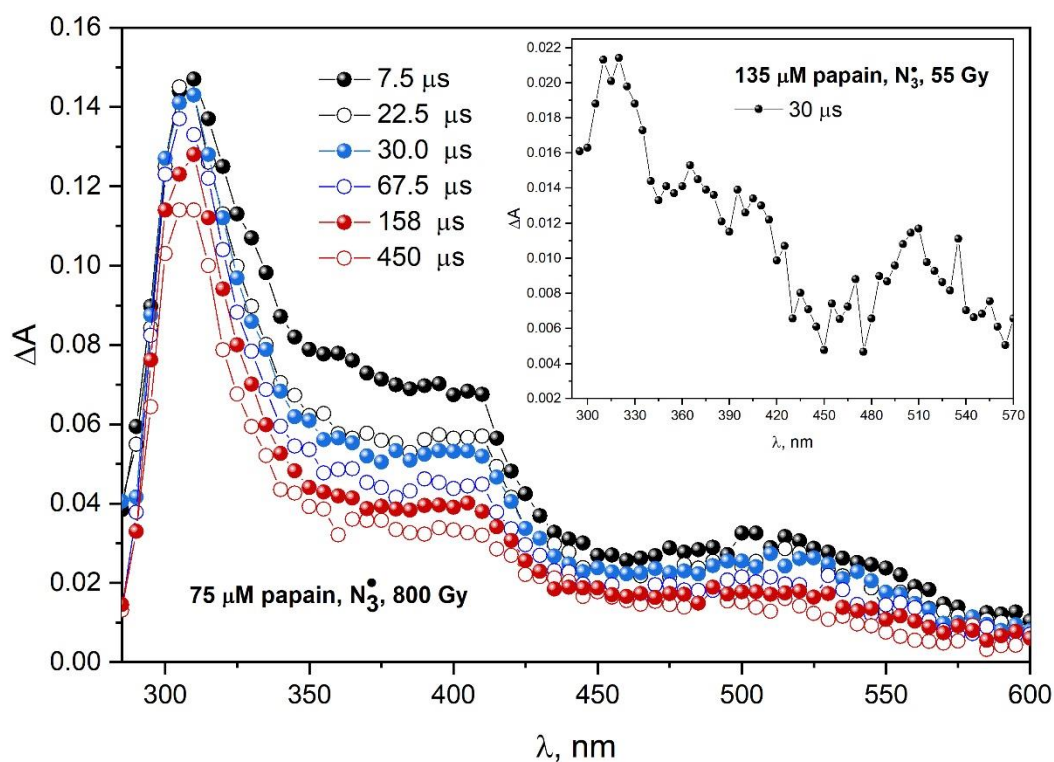

**Figure S11.** Transient absorption spectra of  $N_2O$ -saturated buffer solution containing 75  $\mu M$  papain and 0.1 M  $NaN_3$ , obtained for an irradiation dose of 800 Gy. **Insert.** Transient absorption spectra of  $N_2O$ -saturated buffer solution containing 135  $\mu M$  papain and 0.1 M  $NaN_3$ , obtained for an irradiation dose of 55 Gy.

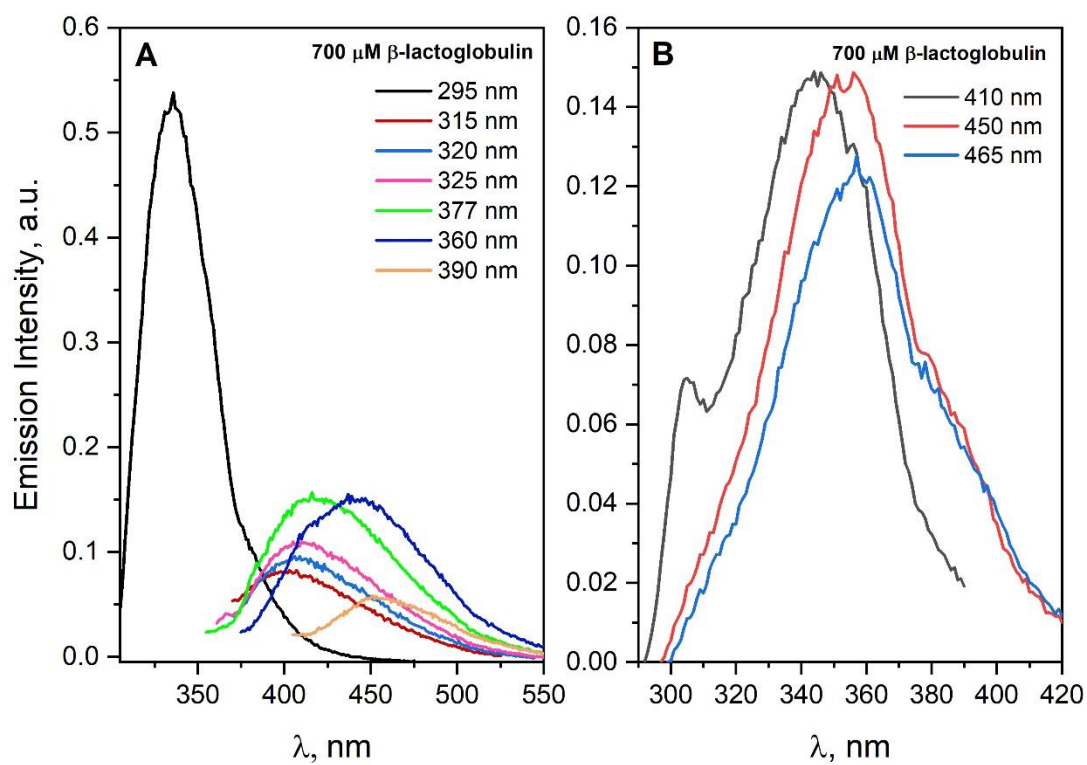

**Figure S12 (A).** Emission spectra of the neat  $\beta$ -lactoglobulin solution (700  $\mu\text{M}$ ). The excitation wavelengths are given in the figure. **(B)** Emission excitation spectra of the neat  $\beta$ -lactoglobulin solution (700  $\mu\text{M}$ ). The emission wavelengths are given in the figure.
